# Supplementary material for: Combined Analysis of HLA Class II Eplet Mismatch and Tacrolimus Levels for the Prediction of De Novo Donor Specific Antibody Development in Kidney Transplant Recipients
Source: MDPI journal article supplement (doi:10.3390/ijms23137357), 2022-07-01
Supplement: s1 [file s1]

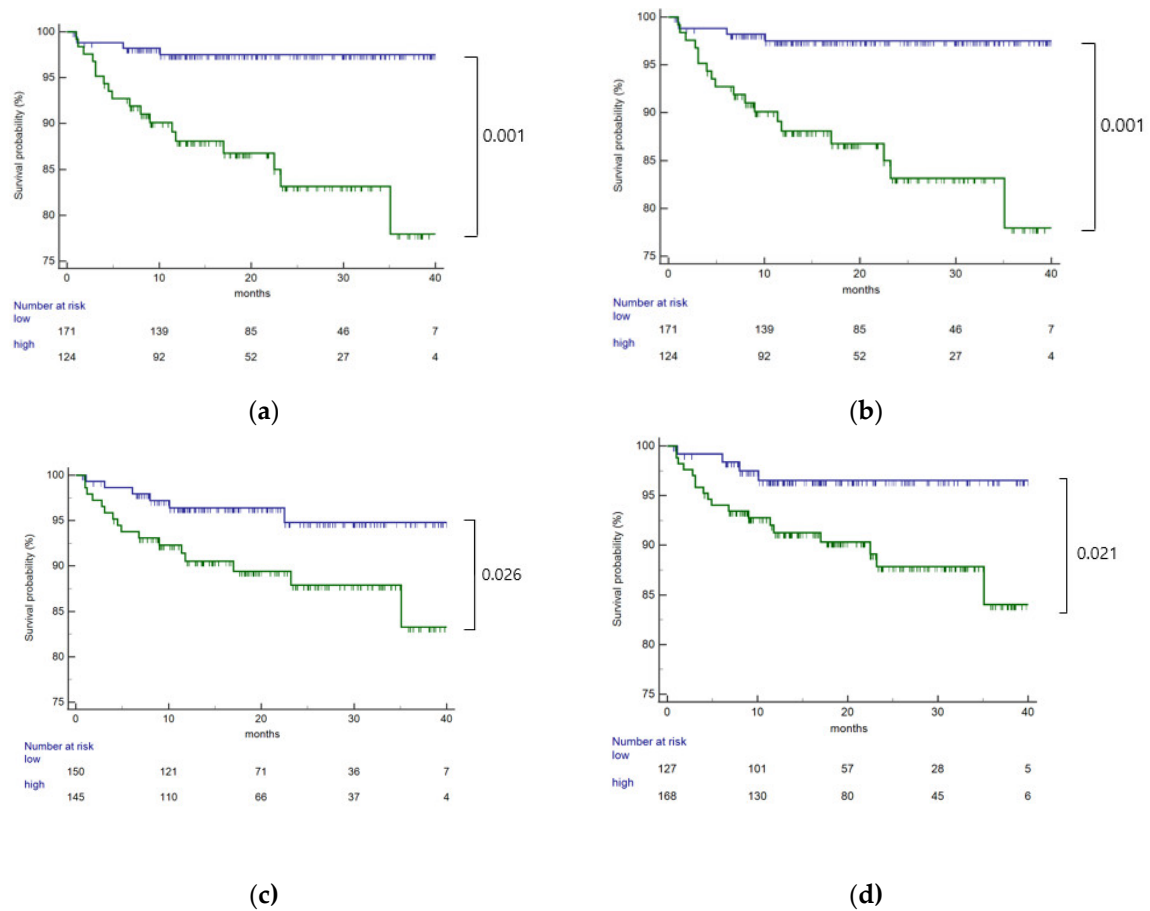

**Figure S1.** HLA-DQ eplet mismatch analysis on the risk of HLA-DQ dnDSA development in class II HLA mismatched recipients (n=295). The high risk group of (a) single molecular eplet mismatch (HLA-DQ >9), (b) total eplet mismatch (HLA-DQ >11), (c) antibody verified eplet mismatch (HLA-DQ >2) and (d) antibody verified single molecular eplet mismatch (HLA-DQ >2) was significantly associated with the risk of class II dnDSA development ( $p < 0.001$  for both single molecular eplet mismatch and total eplet mismatch,  $p < 0.05$  for both antibody verified eplet analysis and antibody verified single molecular mismatch analysis).

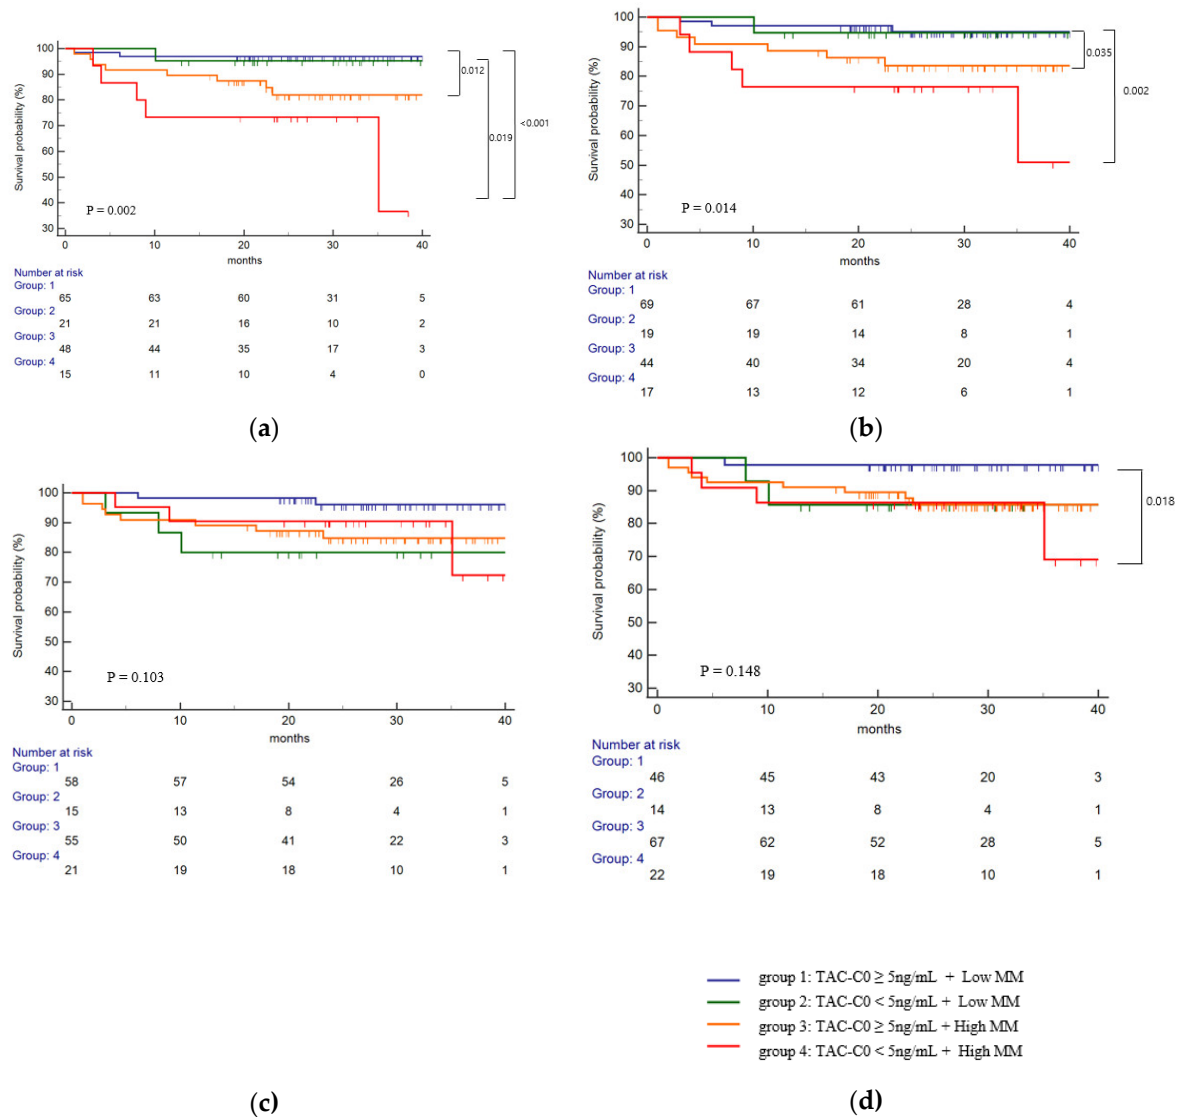

**Figure S2.** Combined effects of HLA-DQ eplet mismatch and TAC-T0 on the risk of HLA-DQ dnDSA development in class II HLA mismatched recipients. (a) In the single molecular mismatch HLA-DQ dnDSA-free survival was worse in group 4 compared to group 1 ( $p < 0.001$ ) and group 2 ( $p = 0.019$ ). Lower dnDSA-free survival was observed in group 3 compared to group 1 ( $p = 0.012$ ). (b) In total eplet mismatch, higher dnDSA-free survival was observed in group 1 compared to group 3 ( $p = 0.035$ ) and group 4 ( $p = 0.002$ ). (c) In the antibody verified eplet mismatch analysis, there was no statistical significance between groups. (d) In the antibody verified single molecular mismatch analysis, group 4 showed significantly worse dnDSA-free survival compared to group 1 ( $p = 0.018$ ).

\* TAC-T0, time-weighted tacrolimus trough level

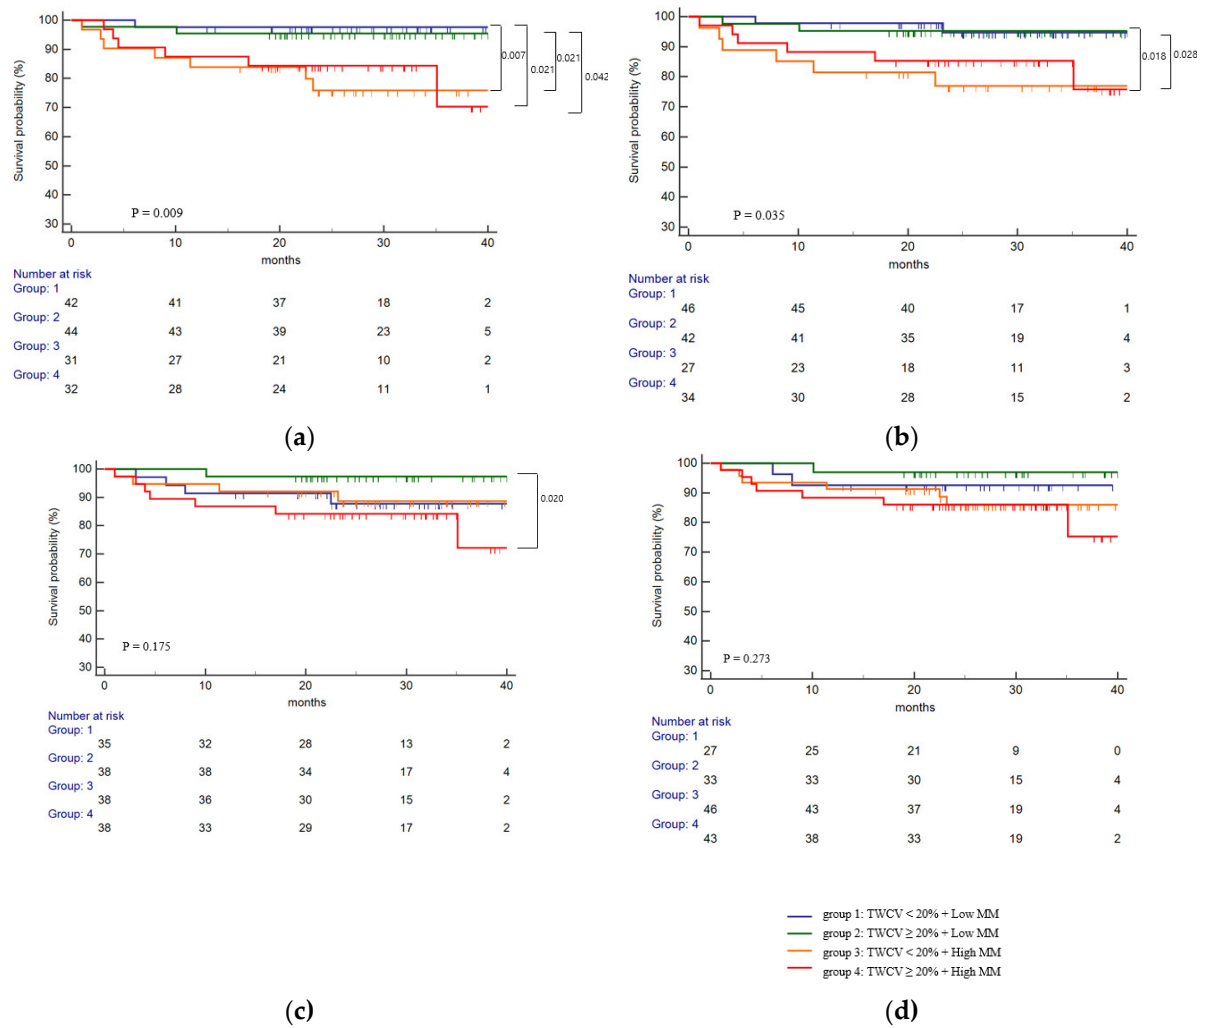

**Figure S3.** Combined effects of HLA-DQ eplet mismatch and TAC-IPV on the risk of HLA-DQ dnDSA development in class II HLA mismatched recipients. (a) In the single molecular mismatch analysis, higher dnDSA-free survival was observed in group 1 compared to group 3 ( $p = 0.007$ ) and group 2 compared to group 4 ( $p = 0.042$ ). Worse dnDSA-free survival was observed in group 4 compared to group 1 ( $p = 0.021$ ), and in group 3 compared to group 2 ( $p = 0.021$ ). (b) In the total eplet mismatch analysis, worse dnDSA-free survival was observed in group 3 compared to group 1 ( $p = 0.018$ ), and group 2 ( $p = 0.028$ ). (c) In the antibody verified eplet mismatch analysis, lower dnDSA-free survival was observed in group 4 compared to group 2 ( $p = 0.020$ ). (d) In the antibody verified single eplet mismatch analysis, there was no statistical significance between groups.

\* TAC-IPV, tacrolimus inpatient variability (TAC-IPV)

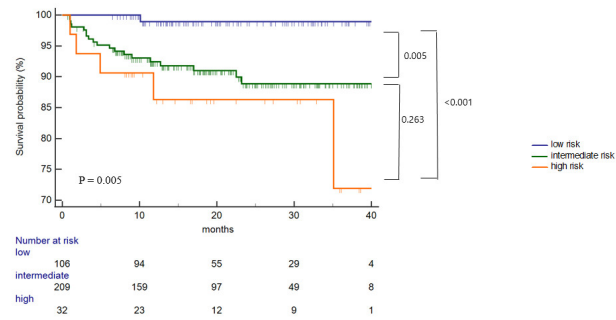

**Figure S4.** Single molecular eplet mismatch analysis using cut-off from a previous study on the risk of class II dnDSA development. We used different cut-off values for single molecular eplet mismatch risk compared with used in Wiebe et al (13). The high-risk group (HLA-DQ  $\geq 15$ ) showed significantly increased risk of dnDSA development compared to the low (HLA-DQ  $\leq 8$ ) ( $p < 0.001$ ). There was significant difference between the low and intermediate (HLA-DQ 9-14) risk group ( $p = 0.005$ ), but no significant difference was observed between the intermediate and high risk group ( $p = 0.263$ ).
