# Supplementary material for: Combined Analysis of HLA Class II Eplet Mismatch and Tacrolimus Levels for the Prediction of De Novo Donor Specific Antibody Development in Kidney Transplant Recipients
Source: MDPI journal article supplement (doi:10.3390/ijms23137357), 2022-07-01
Supplement: s1 [file s1]

**Table S1. Validation of proportional hazard assumptions in Multivariate analysis for class II dnDSA development (Schoenfeld test) (n=175)<sup>a</sup>.**

| Single molecular eplet |            |              | Total eplet |              | Antibody-verified eplet |              | Antibody-verified single molecular |              |
|------------------------|------------|--------------|-------------|--------------|-------------------------|--------------|------------------------------------|--------------|
|                        | Chi-square | $\rho$ value | Chi-square  | $\rho$ value | Chi-square              | $\rho$ value | Chi-square                         | $\rho$ value |
| Eplet MM & TAC-T0      |            |              |             |              |                         |              |                                    |              |
| Age                    | 0.671      | 0.413        | 0.563       | 0.453        | 0.492                   | 0.483        | 0.607                              | 0.436        |
| Group                  | 1.744      | 0.627        | 0.500       | 0.919        | 0.779                   | 0.854        | 2.519                              | 0.472        |
| Global                 | 2.446      | 0.654        | 1.333       | 0.856        | 1.376                   | 0.848        | 3.525                              | 0.474        |
| Eplet MM & TWCV        |            |              |             |              |                         |              |                                    |              |
| Age                    | 0.733      | 0.392        | 0.616       | 0.433        | 0.548                   | 0.459        | 0.650                              | 0.420        |
| Group                  | 1.144      | 0.767        | 1.898       | 0.594        | 0.434                   | 0.933        | 2.020                              | 0.568        |
| Global                 | 1.793      | 0.774        | 2.268       | 0.687        | 1.122                   | 0.891        | 2.850                              | 0.583        |

<sup>a</sup> Models were adjusted for the following characteristics: age, sex, induction type, and ABO compatibility. Univariate results with  $\rho$ -value <0.2 were included in the multivariate analysis. Multivariate analysis of each eplet mismatch category was performed separately.

\* Group 1 represents patients with high TAC-T0 + low/intermediate eplet mismatch, Group 2 represents patients with low TAC-T0 + low/intermediate eplet mismatch, Group 3 represents patients with high TAC-T0 + high eplet mismatch, Group 4 represents patients with low TAC-T0 + high eplet mismatch

\* MM, mismatch; TAC-T0, time-weighted tacrolimus trough level; TWCV, TAC-C0 time-weighted coefficient variability

**Table S2. Multivariate analysis for HLA-DQ dnDSA development in subgroup (n=149)<sup>a</sup>.**

| Single molecular eplet |                   |              | Total eplet       |              | Antibody-verified eplet |              | Antibody-verified single molecular |              |
|------------------------|-------------------|--------------|-------------------|--------------|-------------------------|--------------|------------------------------------|--------------|
|                        | HR (95% CI)       | $\rho$ value | HR (95% CI)       | $\rho$ value | HR (95% CI)             | $\rho$ value | HR (95% CI)                        | $\rho$ value |
| Eplet MM & TAC-T0      |                   |              |                   |              |                         |              |                                    |              |
| Group 1                | Reference         |              | Reference         |              | Reference               |              | Reference                          |              |
| Group 2                | 1.04 (0.13-8.36)  | 0.968        | 1.06 (0.13-8.39)  | 0.955        | 4.85 (1.28-18.29)       | 0.019        | 3.48 (0.72-16.79)                  | 0.120        |
| Group 3                | 3.77 (1.41-10.09) | 0.008        | 3.21 (1.18-8.68)  | 0.022        | 3.17 (1.18-8.52)        | 0.022        | 3.06 (1.13-8.28)                   | 0.028        |
| Group 4                | 8.03 (2.62-24.66) | 0.000        | 6.22 (2.07-18.66) | 0.001        | 2.92 (0.77-11.09)       | 0.115        | 4.09 (1.19-14.09)                  | 0.025        |
| Eplet MM & TWCV        |                   |              |                   |              |                         |              |                                    |              |
| Group 1                | Reference         |              | Reference         |              | Reference               |              | Reference                          |              |
| Group 2                | 0.94 (0.19-4.56)  | 0.939        | 0.90 (0.19-4.28)  | 0.899        | 0.35 (0.04-2.73)        | 0.315        | 0.47 (0.06-3.82)                   | 0.482        |
| Group 3                | 5.17 (1.79-14.85) | 0.002        | 4.56 (1.57-13.26) | 0.005        | 1.47 (0.46-4.74)        | 0.520        | 2.17 (0.74-6.35)                   | 0.158        |
| Group 4                | 4.16 (1.39-12.47) | 0.011        | 3.42 (1.17-9.97)  | 0.024        | 2.66 (0.99-7.08)        | 0.050        | 2.79 (0.99-7.79)                   | 0.051        |

<sup>a</sup> Models were adjusted for the following characteristics: age, sex, induction type, and ABO compatibility. Univariate results with *p*-value <0.2 were included in the multivariate analysis. Multivariate analysis of each eplet mismatch category was performed separately.

\* Group 1 represents patients with high TAC-T0 + low eplet mismatch, Group 2 represents patients with low TAC-T0 + low eplet mismatch, Group 3 represents patients with high TAC-T0 + high eplet mismatch, Group 4 represents patients with low TAC-T0 + high eplet mismatch

\* HR, hazard ratio; MM, mismatch; TAC-T0, time-weighted tacrolimus trough level; TWCV, TAC-C0 time-weighted coefficient variability
